1 **Associations between weather and *Plasmodium vivax* malaria in an elimination setting in**  
2 **Peru: a distributed lag analysis**

3 Gabriella Barratt Heitmann,<sup>1\*</sup> Xue Wu,<sup>2</sup> Anna T. Nguyen,<sup>1</sup> Astrid Altamirano-Quiroz,<sup>3</sup> Sydney Fine,<sup>2</sup>  
4 Bryan Fernandez-Camacho,<sup>3</sup> Antony Barja,<sup>3</sup> Renato Cava,<sup>3</sup> Verónica Soto-Calle,<sup>3</sup> Hugo Rodriguez,<sup>4</sup>  
5 Gabriel Carrasco-Escobar,<sup>3</sup> Adam Bennett,<sup>2</sup> Alejandro Llanos-Cuentas,<sup>3</sup> Erin A. Mordecai,<sup>5,6</sup> Michelle S.  
6 Hsiang,<sup>2,7,8,9</sup> Jade Benjamin-Chung<sup>1,9</sup>

7

8 1. Department of Epidemiology and Population Health, School of Medicine, Stanford University,  
9 Stanford, CA, USA

10 2. Malaria Elimination Initiative, Institute for Global Health Sciences, University of California San  
11 Francisco (UCSF), San Francisco, CA, USA

12 3. Instituto de Medicina Tropical, Alexander von Humboldt, Universidad Peruana Cayetano Heredia,  
13 Lima, Perú

14 4. Universidad Nacional de la Amazonía Peruana, Loreto, Perú

15 5. Department of Biology, Stanford University, Stanford, CA, USA

16 6. Woods Institute for the Environment, Stanford University, Stanford, CA, USA

17 7. Department of Epidemiology and Biostatistics, UCSF, San Francisco, CA, USA

18 8. Department of Pediatrics, UCSF, San Francisco, CA, USA

19 9. Chan Zuckerberg Biohub, San Francisco, CA, USA

20

21 \*Corresponding author contact information:

22 Email: [gabbyrbh@stanford.edu](mailto:gabbyrbh@stanford.edu)

23 Phone number: 609-972-2178

24 ORCID: <https://orcid.org/0000-0002-4212-0954>

25

26 **Conflicts of Interest Statement**

27 *The authors declare they have no conflicts of interest related to this work to disclose.*

28

29 **Funding Statement**

30 *Research reported in this publication was supported by grants to MH from the National Institute of*  
31 *Allergy and Infectious Disease under Award Number U01AI157962.*

32 **ABSTRACT**

33 **Background**

34 *Plasmodium vivax* (*Pv*) is the predominant malaria species in countries approaching elimination.  
35 In the context of climate change, understanding environmental drivers of transmission can guide  
36 interventions, yet evidence is limited, particularly in Latin America.

37

38 **Objectives**

39 We estimated the association between temperature and precipitation and *Pv* malaria incidence in  
40 a malaria elimination setting in Peru.

41

42 **Methods**

43 We analyzed malaria incidence data from 2021-2023 from 30 communities in Loreto, Peru with  
44 hourly weather data from the ERA5 dataset and land cover data from MapBiomias. Predictors  
45 included average weekly minimum and maximum temperature, high heat (>90th percentile mean  
46 temperature), total weekly precipitation, and heavy rain (>90th percentile total precipitation). We  
47 fit non-linear distributed lag models for continuous weather predictors and generalized additive  
48 models for binary predictors and the lookback period was 2—16 weeks. Temperature models  
49 adjusted for total precipitation; precipitation models adjusted for maximum temperature. We  
50 performed subgroup analyses by season, community type, and distance to forest edge.

51

52 **Results**

53 The median vs. lowest values of weekly average minimum temperature was associated with 2.16  
54 to 3.93-fold higher incidence 3-16 weeks later (5-week lag incidence ratio (IR) =3.93 [95% CI  
55 2.18, 7.09]); for maximum temperature, the association was hump-shaped across lags, with  
56 protective associations at 1-2 and 15-16 week lags and 1.07-1.66-fold higher incidence at 6-13  
57 week lags. High heat (>27.5°C) was associated with 1.23 to 1.37-fold higher incidence at 5--9  
58 week lags (9-week lag IR = 1.25 [1.02, 1.53]). Associations between total precipitation and  
59 malaria incidence were hump-shaped across lags, with the strongest positive association at 750  
60 mm of precipitation at a 9-week lag (IR=1.56; [1.27, 1.65]). Heavy rain (>186mm) was  
61 associated with 1.22–1.60-fold higher incidence at 2–10 week lags (9-week lag IR=1.23 [1.02,  
62 1.49]).

63

64 **Discussion**

65 Higher temperatures and precipitation were generally associated with higher malaria incidence  
66 over 1–4 months.

67

68

69

## 70 INTRODUCTION

71 As countries approach malaria elimination, the proportion of malaria infections due to  
72 *Plasmodium vivax* (*Pv*) increases.<sup>1</sup> *Pv* presents unique challenges for malaria elimination efforts  
73 because of its ability to survive in a wide range of environments, including temperate settings, by  
74 utilizing a dormant hypnozoite stage.<sup>2</sup> Relapsing infections occur weeks to months after a prior  
75 infection or relapse, and serve as a significant reservoir for persistent transmission.<sup>3 4,5</sup> That *Pv*  
76 infections can be latent, as well asymptomatic, sub-patent, or minimally symptomatic makes  
77 diagnosis and surveillance a challenge. Further, symptomatic infections are low density and often  
78 missed through standard diagnostics.<sup>4,6,7</sup> These characteristics greatly obfuscate *Pv* transmission  
79 biology and make *Pv* harder to detect, treat, and ultimately eliminate.

80  
81 Climatic and environmental factors such as temperature, precipitation, land use, and vegetation  
82 are strong drivers of malaria transmission in various endemic settings.<sup>8</sup> All initial *Pv* infections  
83 are environmentally mediated, and understanding these drivers is critical to interrupting the long,  
84 enduring cycles of *Pv* transmission described above. Increased precipitation can increase  
85 standing water presence, soil moisture, and humidity, which in turn increase breeding habitat for  
86 *Anopheles*,<sup>9</sup> the vector for malaria transmission. However, this relationship is complicated: in  
87 dry-land communities, heavy rain can flush mosquito larvae, leading to decreased mosquito  
88 populations, whereas in riverine settings such as in the Amazon, flooding from heavy rains can  
89 increase breeding ground and mosquito populations.<sup>9</sup> Temperature has strong effects on the  
90 capacity of the *Anopheles* vector to transmit malaria via the mosquito biting rate, mosquito  
91 abundance, parasite incubation rate, and mosquito longevity.<sup>10,11</sup> A schematic of the timeline of  
92 these environmental drivers of transmission is presented in Figure 1, generated from prior  
93 findings.<sup>6,12–16</sup> Modeling suggest *Pf* malaria transmission by various *Anopheles* peaks at  
94 25°C,<sup>10,17</sup> with substantial decreases in transmission above this thermal optimum. More recent  
95 work has supported this thermal optimum for both *Pf* and *Pv* transmission by *An. gambiae*.<sup>11</sup>  
96 Finally, weather could be a direct trigger for relapse infections for *Pv* infections<sup>18</sup>, and there is  
97 other indirect evidence that relapses may be triggered by antigens in uninfected mosquito saliva  
98 (biting rate is temperature-sensitive).<sup>3</sup> However, there is limited research on environmental  
99 drivers of *Pv*, especially in Latin America, including in the Amazon, which is estimated to bear  
100 5% of the world's *Pv* malaria burden.<sup>6</sup>

101  
102 Our objective was to assess the influence of rainfall and temperature on *Pv* incidence in Loreto  
103 Region, Peru, a low transmission area key to the Peruvian government's target of malaria  
104 elimination by 2030.<sup>19</sup> Environmental risk factors for malaria tend to be highly localized,<sup>20,21</sup> and  
105 the Loreto Region has maximum temperatures between 30–35°C thought to be above the malaria  
106 transmission thermal optimum, and daily temperature extremes are thought to impact malaria  
107 transmission<sup>22</sup>. To our knowledge, the thermal biology of *Pv* transmission by *An. darlingi*, the  
108 primary vector in this region, has not been well characterized in disease ecology studies.

109 Information about climatic drivers of *Pv* transmission is needed to inform effective tailoring and  
110 targeting of interventions for malaria elimination.

111

112

## 113 **METHODS**

### 114 **Study design**

115 We analyzed malaria incidence data collected from January 2021 to December 2023 in 30  
116 communities in San Juan Bautista, Punchana, Alto Nanay, Iquitos, and Belen districts in Loreto  
117 region, Peru, an area covering 2,569 km<sup>2</sup> (Figure 2). This study used data collected prior to  
118 baseline for the FocaL Mass Drug Administration for Vivax Malaria Elimination (FLAME) trial  
119 in Peru (NCT05690841), and therefore communities included in this study were those that met  
120 the eligibility criteria for FLAME. The study included surveillance data from riverine  
121 communities only accessible via boat on the Itaya, Momón, and Nanay rivers and dryland  
122 communities along the Iquitos-Nauta highway. The spatial distribution of these communities is  
123 shown in Figure 2. According to a census conducted for the FLAME trial, the average population  
124 size of each community was 240 individuals (range: 31 to 807).

125

126 Peru's malaria burden is concentrated in the Loreto Region, which includes a large swath of the  
127 Peruvian Amazon.<sup>7</sup> Since the 1990s, rapid urbanization and deforestation in the area surrounding  
128 Iquitos, the capital of the Department of Loreto, has contributed to increased malaria burden<sup>7</sup>,  
129 likely through increased forest edge habitat, which promotes mosquito breeding, survival, and  
130 biting<sup>23</sup>. While this region is approaching elimination, sustained, endemic transmission remains,  
131 with an annual incidence rate of 17.4 cases per 1000 in 2019,<sup>19</sup> and *Pv* malaria accounts for  
132 approximately 80% of the malaria burden.<sup>7</sup> Transmission typically peaks in Loreto between  
133 February and July<sup>7</sup> and there is a sizable asymptomatic caseload.<sup>13</sup> Asymptomatic infections  
134 typically go undetected and uncounted in routine malaria surveillance in Peru,<sup>13</sup> since only  
135 febrile individuals are tested.

136

137 From 2005-2010, there was a large effort towards malaria elimination via the Project for Malaria  
138 Control in Andean Border Areas (PAMAFRO) program that improved case management,  
139 including through community case workers, and deployed insecticide-treated bed nets.<sup>7</sup>  
140 Transmission declined during the project, but the project did not achieve elimination, and  
141 transmission has since risen.<sup>24</sup> Following PAMAFRO, the government of Peru adopted Plan  
142 Malaria Cero (PMC) in 2017 to achieve malaria elimination. Control activities over the study  
143 period involved some reactive (RCD) and active case detection (ACD), distribution of long-  
144 lasting insecticide-treated bed nets, indoor residual spraying, and community-level  
145 chemoprophylaxis<sup>25</sup>.

146

### 147 **Outcome data**

148 Our primary outcome was weekly community-level vivax malaria incidence primarily measured  
149 through passive case detection conducted by the Peruvian Ministry of Health (MINSA), though  
150 PMC activities including ACD and RCD also occurred over the study period and were recorded  
151 in surveillance data. Both physical records stored in health posts and online records compiled by  
152 MINSA were used in this analysis. Febrile patients presented for care at a health post and were  
153 tested for malaria via microscopy. According to PMC policy<sup>25</sup>, blood smears are stained with 2%  
154 Giemsa for 30 minutes. Parasite densities are calculated from the number of asexual parasites per  
155 200 leukocytes (or per 500, if <10 asexual parasites/200 leukocytes), assuming a leukocyte count  
156 of 8,000/ $\mu$ L. A blood smear is considered negative if examination of 100 high power fields does  
157 not reveal asexual parasites. Thin smears are used for parasite species identification. Slides are  
158 read by two microscopists. If there are discordant results, the results are determined by a third  
159 microscopist. Only *Pv* cases were included in the present study, and the data did not distinguish  
160 between primary infections versus relapse cases. Cases were matched to community census data  
161 to confirm community of residence, and then matched to a community centroid. Population  
162 counts per community were calculated from a census conducted from 2023, which was adjusted  
163 via interpolation for missing and/or non-participatory households.

164

### 165 **Environmental variables**

166 We obtained temperature and precipitation data from the ERA5-Land Hourly dataset collected  
167 by the Copernicus Climate Change Service<sup>26</sup>. We used the air temperature at 2 meters above the  
168 surface (K) band for all temperature variables and the total precipitation (m) band for  
169 precipitation variables. Weather variables were matched to incidence data via community  
170 centroid.

171

172 We imputed temperature or precipitation values less than 0 as missing. We aggregated hourly  
173 temperature values into the weekly minimum, mean, and maximum temperature; the average of  
174 each day's temperature range (maximum minus minimum) over a week; and total precipitation  
175 observed each week. We defined a binary indicator for high heat events coded as 1 for weeks  
176 with any days when the mean daily temperature exceeded the 90th percentile of mean daily  
177 temperatures for that year (average over all years was 27.5°C) and 0 otherwise. Similarly, we  
178 defined a binary indicator for heavy rain events coded as 1 for weeks with any days when the  
179 total daily precipitation exceeded the 90th percentile of total daily precipitation for that year  
180 (average of all years was 186mm) and 0 otherwise.

181

182 We conducted a distinct household-level analysis on distance to forest edge as a potential effect  
183 modifier of the associations between temperature and rainfall and malaria incidence. Minimum  
184 distance to forest edge was calculated from the MapBiomias Perú 2022 dataset.<sup>27</sup> We retained  
185 forest classes (forest, dry forest, mangrove, and flooded forest) and removed all other classes.  
186 These forest cells were transformed into vector point data for the distance calculation. For each  
187 household, we calculated the minimum Euclidean distance to the nearest forest within a 5-

188 kilometer (km) radius around each household. There were no households for which the minimum  
189 distance to forest edge was greater than 5km. Population density was calculated from the census  
190 data. A population density raster was created by summing up the number of individuals in each  
191 household with 1km by 1km resolution. Population density values were then extracted for each  
192 household GPS point.

193

#### 194 **Statistical analysis**

195 We published a pre-analysis plan at <https://osf.io/fgr6w>. Deviations from the pre-analysis plan  
196 are listed in Table S1. All positive cases were matched to weather data. Thus, we performed a  
197 complete case analysis.

198

199 We assessed associations between malaria incidence and weather variables using distributed lag  
200 models. We chose a 2–16 week lookback period (i.e. an infection during the course of  
201 epidemiologic week 20 looked back to epidemiologic weeks 2—18) to account for potential  
202 variation in the influence of rainfall and temperature in *Pv* transmission and to account for  
203 potential impacts on relapse cases (Figure 1). For continuous exposures (weekly maximum  
204 temperature, weekly mean temperature, weekly mean temperature range, weekly minimum  
205 temperature, and total precipitation), we fit non-linear distributed lag (DL) models<sup>28</sup> with a log  
206 link and Poisson family using weekly malaria case counts per village as the dependent variable  
207 with an offset for log community population size. For the distributed lag cross-basis function, we  
208 specified a log function with 2 knots to allow for more flexible variation in the short term, and  
209 natural splines with 2 degrees of freedom for the non-linear predictors, which yielded the lowest  
210 AIC and BIC in model testing. All incidence ratios were calculated relative to reference weeks.  
211 For temperature predictors, weeks with the minimum observed value during the study period  
212 were used as the reference. For total precipitation, weeks with 0 mm of precipitation were used  
213 as the reference. Continuous temperature variables were adjusted for the cross-basis matrix for  
214 total precipitation, and total precipitation was adjusted for the cross-basis matrix for maximum  
215 temperature.

216

217 For binary predictors (high heat and heavy rain) we fit generalized additive models (GAMs) with  
218 a Poisson family and log link and an offset for community population size. We fit separate  
219 models at each lag from 2–16 weeks. We adjusted the high heat model for total precipitation at  
220 the concurrent lag modeled as a smooth term with  $k = 3$ . Similarly, we adjusted the heavy rain  
221 model for maximum temperature at the concurrent lag modeled as a smooth term with  $k = 3$ .

222

223 To examine the influence of other environmental factors, we conducted subgroup analyses by:  
224 distance to forest edge (above/below the median), season (rainy/dry), and community type  
225 (riverine/dry land). We discretized the distance from each household to the nearest forest edge  
226 into a binary variable for above or below median distance, and categorized months November-  
227 April as the rainy season and all other months as the dry season based on both historical

228 precedence<sup>7</sup> and data for our study. For distance to forest edge models, we aggregated incidence  
229 per household-week and adjusted for 1km population density. We fit the same DL models as the  
230 main effect models on subsets of the data according to the subgroup, and non-forest models were  
231 offset for community size. We also assessed the association between the minimum distance to  
232 forest edge as both a continuous and categorical predictor and fit GAMs with Poisson  
233 distributions and log link functions.

234

235 For the association between maximum temperature and malaria incidence, we conducted two  
236 sensitivity analyses with additional adjustments. First, we adjusted for both total precipitation  
237 and minimum temperature at concurrent lags to account for potential collinearity between  
238 minimum temperature and maximum temperature (Pearson's correlation coefficient = 0.48).  
239 Second, we adjusted for minimum temperature at concurrent lags and total precipitation at 4-  
240 week delayed lags, where we only considered the effect of precipitation beginning at 6 weeks  
241 and continuing through 20 weeks. This time-delayed lag was included to account for the onset of  
242 the rainy season about 4 weeks after the highest maximum temperatures were typically observed  
243 (Figure 3).

244

245 For the association between total precipitation and malaria incidence, we conducted a sensitivity  
246 analysis where we adjusted for minimum temperature instead of maximum temperature. The  
247 Pearson's correlation coefficient for total precipitation and maximum temperature was -0.30, and  
248 thus we kept this as the main effect adjustment covariate, while the Pearson's correlation  
249 coefficient for total precipitation and minimum temperature was 0.1.

250

251 Because incidence data for the weather models was aggregated at the community level, we did  
252 not test for spatial autocorrelation or adjust for spatial clustering. All hourly to daily aggregation  
253 was performed using the Python API for Google Earth Engine on Google Colab servers. Weekly  
254 aggregation and modeling were performed in R version 4.2.1. All distributed lag models were  
255 built using the R package DLNM version 2.4.7<sup>29</sup>. This study was approved by the Institutional  
256 Review Board of Stanford University (72291) and by the Dirección Universitaria de Asuntos  
257 Regulatorios de la Investigación de la Universidad Peruana Cayetano Heredia (211747).

258

259

## 260 **RESULTS**

261 During the study period from January 2021 to December 2023, the rainy season generally lasted  
262 from November through April (Figure 3). Weekly cumulative precipitation ranged between 500–  
263 1750 mm during the rainy season and did not exceed 500mm in the dry season which lasted  
264 roughly from July through October.

265

266 Minimum temperature varied from 22–26°C, and maximum temperature varied from 28–38°C.

267 The weekly mean temperature range varied from 4–12°C. During the dry season, there was more

268 variation in temperature: minimum temperature dipped below 20°C in the early dry season, while  
269 temperature peaked during the late dry season, with maximum temperature values as high as  
270 38°C.

271  
272 The mean threshold for high heat events across all study years was 27.5°C, and high heat events  
273 generally occurred just prior to the rainy season. The mean threshold for heavy rain events across  
274 all study years was 186 mm, and there were more heavy rain events during the rainy season than  
275 the dry season. 2023 was an El Niño year, reflected by the low precipitation and high  
276 temperature compared to 2022 and 2021. Malaria incidence did not appear to follow a distinct  
277 seasonal trend.

### 278 279 **Temperature**

280 Associations between minimum or maximum temperature and malaria incidence are shown in  
281 Figure 4. Weeks with a minimum temperature of 22.5°C (the median) were associated with 2.16–  
282 3.93-fold higher malaria incidence for lags 3–16 weeks compared to weeks with the lowest  
283 minimum temperature of 16.8°C, with the incidence ratio peaking at lag of 5 weeks (IR = 3.93,  
284 95% CI 2.18–7.09) (Figure 4A, 4C). Malaria incidence was approximately 3- to 4-fold higher for  
285 minimum weekly temperatures above 16.8°C at a 5-week lag (Figure 4B).

286  
287 The effect of median maximum temperature on incidence was non-linear and hump-shaped  
288 across lag time (Figure 4D). Median maximum temperature was associated with higher incidence  
289 at lags of 6–13 weeks, whereas it was associated with lower incidence at the extremes of 3 weeks  
290 and 14–16 weeks. Compared to weeks with the lowest maximum temperature (28.4°C), weeks  
291 with a maximum temperature of 31.8°C (the median) were associated with 66% higher malaria  
292 incidence (95 CI 1.35–2.04) at a 9-week lag (Figure 4D, 4F). The positive association between  
293 median maximum temperature and malaria incidence grew stronger as maximum temperatures  
294 increased to 32.5°C, then plateaued and confidence intervals were wide (Figure 4E).

295  
296 In a sensitivity analysis adjusting for concurrent total precipitation and minimum temperature,  
297 compared to weeks with the lowest maximum temperature, weeks with a maximum temperature  
298 of 31.8°C (the median) were still associated with higher malaria incidence at 6–11 week lags  
299 (Figure S1). There was no association at other lags. In another sensitivity analysis adjusting for  
300 minimum temperature at concurrent lags and total precipitation at 4-week delayed lags, weeks  
301 with a maximum temperature of 31.8°C (the median) were still associated with higher malaria  
302 incidence at 6–9 week lags (Figure S2) and were not associated with incidence at other lags.

303  
304 Weeks with high heat events (one or more days when the daily mean temperature exceeded  
305 27.5°C) were associated with 35% lower malaria incidence at a 2-week lag and 1.23–1.37-fold  
306 higher malaria incidence at lags 5–9 weeks compared to weeks with no high heat events (Figure  
307 5A, Table S2).



308  
309 For analyses of mean temperature, compared to weeks with the lowest value (23.1°C), weeks  
310 with a mean temperature of 25.6°C (the median) were associated with 10–44% lower malaria  
311 incidence for lags 2–8 weeks (Figure S3A, S3C), and the association was strongest at a 3-week  
312 lag (IR = 0.66, 95% CI 0.51–0.84). The protective association was stronger at higher mean  
313 temperatures at a 3-week lag (Figure S3B).

314  
315 For analyses of temperature range, compared to weeks with the narrower ranges of 4.3°C, weeks  
316 with a temperature range of 6.5°C (the median) were associated with 1.33- to 1.94-fold higher  
317 malaria incidence for lags 6–14 weeks (Figure S4A, S4C), with the strongest association at a 9-  
318 week lag (IR = 1.94, 95% CI 1.58–2.38). The positive association was stronger at wider mean  
319 temperature ranges at a 9-week lag (Figure S4B).

### 320 321 **Precipitation**

322 The association between the effect of precipitation median precipitation on incidence was non-  
323 linear and hump-shaped across lag time (Figure 6A). Compared to weeks with no rainfall, weeks  
324 with 450mm of precipitation (the median) were associated with 1.13- to 1.45-fold higher malaria  
325 incidence for lags 6–14 weeks, with the strongest association at 9 weeks (IR = 1.45, 95% CI  
326 1.27–1.65) (Figure 6A, 6C). The association was also non-linear and hump-shaped across the  
327 range of precipitation values, with the strongest associations with malaria incidence at  
328 approximately 750mm of precipitation at a 9-week lag (Figure 6B). In a sensitivity analysis  
329 adjusting for minimum temperature instead of maximum temperature, associations were still  
330 positive but somewhat attenuated towards the null (Figure S5).

331  
332 Compared to weeks without heavy rain, weeks with heavy rain events (one or more days when  
333 the daily precipitation exceeded 186mm) were associated with 1.22–1.60-fold higher malaria  
334 incidence at lags 2-10 weeks, with the strongest association at 6 weeks (IR = 1.60, 95% CI 1.33–  
335 1.94) (Figure 5B). Heavy rain was associated with 24% lower malaria incidence at 16 weeks  
336 (95% CI 0.63–0.92).

### 337 338 **Sub-group analyses**

339 In a sub-group analysis by season, high heat events were protective in the dry season and  
340 associated with higher incidence in the rainy season at longer lags (Figure S6); heavy rain events  
341 were associated with higher incidence in the rainy season at up to 11-week lags, while results  
342 were generally null for the dry season (Figure S6).

343  
344 We also performed a sub-group analysis by community type; 13 communities were classified as  
345 dryland communities, while 16 were riverine. High heat events were associated with higher  
346 incidence in dryland communities and lower incidence in riverine communities at longer lags  
347 (Figure S7); heavy rain events were generally associated with higher incidence in dryland

348 communities across all lags, but lower incidence in riverine communities at longer lags (Figure  
349 S7).

350

351 At most lags, the association between malaria incidence and maximum temperature or total  
352 precipitation did not vary by a household's minimum distance to forest edge (Figure S8, S9).  
353 Shorter minimum distance to forest edge was associated with higher malaria incidence (Figure  
354 S10). For households living within 50m of forest edge, malaria incidence was 2.18-fold higher  
355 (95% CI 2.18–2.19) compared to those who lived 500m or beyond from forest edge (Figure  
356 S1A).

357

358 All main effect continuous predictor estimates can be found in Table S2. All main effect binary  
359 predictor estimates can be found in Table S3.

360

361

## 362 **DISCUSSION**

363 In this study of associations between temperature and precipitation with malaria incidence in  
364 Loreto Region, Peru, we found that higher minimum temperatures, maximum temperatures,  
365 temperature ranges, and total precipitation were all associated with higher malaria incidence  
366 compared to weeks with minimum values. Mean temperature was generally associated with  
367 lower malaria incidence in the short (2–4 weeks) and medium (5–10 weeks) term. The effect  
368 of these weather variables generally lasted over many weeks, with the longest duration and  
369 strongest associations with minimum temperature. The effect of minimum temperature also  
370 began sooner and lasted longer than that of maximum temperature or temperature range. This  
371 may suggest that cooler minimum temperatures are a limiting factor for malaria transmission.  
372 High heat events were associated with lower malaria incidence in the short term and higher  
373 malaria incidence in the medium term. Heavy rain events were generally associated with  
374 increased malaria risk in the short and medium term, and lower malaria incidence in the long  
375 term (11–16 weeks). There was strong evidence that living further away from forest edges was  
376 protective. Overall, findings suggest that higher temperatures, particularly minimum  
377 temperatures, and periods of sustained rainfall could lead to periods of increased malaria burden.

378

379 In general, our findings suggest that weather influences malaria transmission over 1-4 month lags  
380 in this region. This lasting association may be due to the relapse periodicity of *Pv* malaria. Even  
381 after typical treatment, 6-month relapse infection rates in this region ranged between 27–33%<sup>30</sup>,  
382 but true relapse rates are likely higher because many *Pv* infections go undetected and untreated,  
383 or are treated without medical supervision, outside of study settings<sup>31</sup>. However, the vast  
384 majority of *Pv* infections are estimated to be relapse infections<sup>32</sup>, and thus it is likely that  
385 increased incidence includes relapse cases – another study in this region found that PCR-  
386 confirmed *Pv* prevalence was as high as 25%, most of which were attributed to asymptomatic,  
387 low parasitemia infections.<sup>33</sup> Additionally, though the relapse period for *Pv* infections is poorly

388 understood in this region, relapses from the tropical strains of *Pv* are estimated to range  
389 anywhere from 2–9 months.<sup>16</sup> Though strong geographic and micro-geographic differences exist  
390 in the Peruvian Amazon,<sup>34</sup> a study in neighboring Brazil found that the median time to the first  
391 recurrent infection was 71 days, and that treatment delays the onset of the subsequent relapse  
392 infection, while in Southeast Asia, where short latency *Pv* is also present, 90% of relapse cases  
393 occurred within 6 weeks of the initial infection.<sup>35</sup> The extended association with weather over  
394 many weeks could also reflect a high prevalence of asymptomatic and low parasitemia  
395 infections<sup>4,5</sup>, which could sustain new, onward transmission well past the initial meteorological  
396 trigger.

397

### 398 **Precipitation**

399 We found that weeks with higher precipitation were significantly associated with higher malaria  
400 incidence at lags of 6–14 weeks. These results are generally in accordance with other studies of  
401 the effect of rainfall on *Pv* infections. A meta-analysis in Mauritania found that *Pv* incidence was  
402 highest during and after the rainy season<sup>36</sup> and that decreased rainfall was significantly correlated  
403 with decreased malaria burden; in temperate regions, one study in South Korea found that  
404 increased precipitation was associated with higher malaria incidence at a 10-week lag,<sup>37</sup> while a  
405 similar study in China also found positive associations with precipitation at lags 2–4 weeks.<sup>38</sup>  
406 The lasting influence of precipitation likely reflects increased breeding ground following rainfall,  
407 which could impact multiple transmission cycles.

408

409 Interestingly, heavy rain was generally associated with higher malaria incidence in the rainy  
410 season, but not in the dry season (Figure S8B). There were few heavy rain events in the dry  
411 season, thus limiting the statistical power of this analysis; however, our finding for the rainy  
412 season somewhat aligns with a hydrogeology hypothesis by Hiwas and Bretas<sup>9</sup>, wherein heavy  
413 rain in the rainy season may flood otherwise dry areas, increasing malaria breeding ground. We  
414 also found some evidence of qualitative effect modification by community type, with heavy rain  
415 associated with lower incidence in riverine communities at longer lags and higher incidence at  
416 longer lags in dryland communities (Figure S9B). This finding contradicts the hydrogeology  
417 hypothesis<sup>9</sup>. In riverine communities, heavy rains may be protective if they flush and agitate  
418 otherwise slow-moving rivers and stagnant pools of water and thus disrupt mosquito larva  
419 breeding; on the other hand, in dryland communities, heavy rains may increase risk due to the  
420 accumulation of surface water in otherwise dry areas. In both cases, the effect modification is  
421 strongest at longer lags, signaling that heavy rain had long-lasting effects on the transmission  
422 cycle.

423

424

### 425 **Temperature**

426 We found that higher minimum temperatures were strongly associated with higher malaria  
427 incidence consistently across lags, while maximum temperature and high heat events were

428 associated with higher malaria incidence in the medium term and lower incidence in the short  
429 and long term. Though the thermal optimum of the *Pv*–*An. darlingi* coupling has not been  
430 studied directly, there is some mixed support in the literature from other malaria transmission  
431 couplings: optimal *Pf* malaria transmission is thought to peak at 25°C,<sup>10,17</sup> which generally aligns  
432 with our findings for positive associations with higher minimum temperature, which were in the  
433 range of 20–24°C. Our finding of the strongest associations with minimum temperature are  
434 biologically plausible given that *An. darlingi* typically bite humans at nighttime<sup>39</sup> and daily  
435 temperatures are lowest at night.

436

437 We were surprised to find that higher maximum temperatures in the range of 30–34°C and high  
438 heat events (>27°C) were associated with increased incidence at medium lags and lower  
439 incidence at short lags. Our maximum temperature findings were attenuated, but robust in  
440 sensitivity analyses. High heat events may be correlated with other longer-term weather  
441 variations, such as higher maximum temperature for prolonged periods, that affect incidence.  
442 High temperatures can reduce the vector biting rate and survival rate, which may explain the  
443 negative associations at shorter lags. However, high maximum temperatures may trigger *Pv*  
444 relapse and increase the reservoir of active infections that contribute to onward malaria  
445 transmission, explaining the positive association at medium lags. The positive association  
446 between higher maximum temperature and high heat and malaria at medium lags conflicts with  
447 previous disease ecology literature supporting a thermal optimum for *Anopheles-Pf* malaria  
448 transmission at 25°C with an upper limit of 32.6°C,<sup>10</sup> and validated *Pf* malaria transmission  
449 declines above 28°C<sup>17</sup> in Africa. Our result does have some support in the literature: a study in  
450 neighboring regions of the Amazon with similar maximum temperatures (26.8–35.2°C) found  
451 that a 1°C increase in maximum temperature was associated with higher incidence at 1- and 2-  
452 month lags.<sup>40</sup> Generally, however, *Anopheles* life stages related to transmission (i.e., biting rate,  
453 larva survival, fecundity, adult survival) are thought to decline at the median maximum  
454 temperature range in our study (30–34°C),<sup>11</sup> indicating that vector activity is unlikely to be the  
455 mechanism driving this positive association. Further research on the thermal biology of *Pv*–*An.*  
456 *darlingi* in tropical settings are needed to elucidate the influence of temperature on malaria  
457 transmission in this region. However, it is also possible that microclimates and small-scale  
458 ecological and topographical variation in our study sites tempered high temperatures and their  
459 associated negative impacts on transmission, since our weather data was at 11km resolution and  
460 did not capture temperature variation more finely (i.e. in shaded forest areas, close to water  
461 bodies)

462

463 One alternative explanation is that associations with maximum temperature primarily reflect  
464 relapsing *Pv* infections, which could be triggered by temperature itself or co-infections that are  
465 more common at higher temperatures. Extrinsic triggers of *Pv* relapse include co-infections that  
466 result in host inflammation, subsequent primary *Pv* infections, seasonal changes in sunlight and  
467 temperature, and mosquito bites and their associated immune responses<sup>16,41</sup>. In our study site,

468 dengue is increasingly common,<sup>42</sup> and it is well-documented that dengue transmission is  
469 positively associated with maximum temperatures similar to those in our study<sup>43–45</sup> and has a  
470 higher thermal optimum (29°C) and upper limit (34.5°C) than malaria.<sup>10</sup> If high heat events  
471 trigger *Pv* relapse, symptoms would likely appear within 2 weeks, yet we found positive  
472 associations with maximum temperature at lags of 6–11 weeks. It is possible that high  
473 temperatures activate the hypnozoite and increase the reservoir of active infectious hosts,  
474 potentially leading to onward transmission and multiple cycles of infection, explaining the  
475 delayed positive association.

476  
477 Relationships with high heat varied by season and community type. At lags of 3–4 months, high  
478 heat was associated with higher malaria incidence in the dry season but lower malaria incidence  
479 in the rainy season. High heat events may dry up surface water in the dry season, reducing vector  
480 breeding, while they may lead to stagnation of water bodies in the rainy season, promoting  
481 breeding. Similarly, we found that high heat was associated with higher malaria incidence in  
482 dryland areas, but lower malaria incidence in riverine areas at lags of 3–4 months. In general,  
483 the dryland communities in our study site were more peri-urban and more densely populated;  
484 considering dengue transmission is generally thought to thrive in more urban, densely populated  
485 communities,<sup>46,47</sup> it is possible that elevated incidence reflects higher relapse rates due to co-  
486 infection with diseases like dengue.

#### 487 488 **Limitations**

489 Our study had several limitations. We were unable to distinguish between initial and relapse  
490 infections in our incidence data; we would expect that weather would influence initial and  
491 relapse cases over different lag periods, but our analysis was not able to investigate this.  
492 However, using distributed lag models allowed us to investigate associations over a 4-month  
493 period, including potential relapse cases. A follow-up study using genomic methods to  
494 differentiate relapse and initial infections could shed light on how weather influences primary vs.  
495 relapse infections. Our outcome data also only covered a 3-year period, preventing this analysis  
496 from studying longer climatic trends in incidence in this region. The study period also included  
497 two years (2021 and early 2022) where control efforts for the COVID-19 pandemic likely limited  
498 malaria transmission as well. We were also unable to control for PMC activities nor  
499 interventions over the study period.

500  
501 Regarding the weather data, one of our study years (2023) was an El Niño year; a study  
502 capturing a full El Niño-La Niña cycle could better elucidate associations with incidence along  
503 these more variable climate cycles. While we selected ERA-5 Land remote sensing data for its  
504 temporal coverage, its 11 km spatial resolution prevented identification of small-scale  
505 microclimates, i.e. those created by forest cover and topographical features, and thus did not  
506 capture small-resolution variations that likely have a large effect on mosquito breeding and  
507 survival habitat<sup>48</sup>. Additionally, publicly available surface water data did not reflect our ground

508 observations of surface water in the study site, so we did not include it in this analysis. Further  
509 research that considers mediation by surface water could further shed light on the complicated  
510 dynamics between precipitation and malaria incidence in this region. One such complication that  
511 our study did not resolve is the concentration-dilution hypothesis<sup>9</sup> for malaria transmission,  
512 which posits that heavy rain in riverine communities can cause flooding and increase standing  
513 water presence, leading to increased incidence, while the same heavy rain can flush dryland  
514 communities and lead to decreased incidence. Our sub-group analyses by distance to forest edge,  
515 community type, and season were also likely limited in statistical power; these findings could be  
516 more conclusive with a longer look back period. Furthermore, our binary predictor analyses  
517 modeled individual lags separately and did not account for time autocorrelation, limiting  
518 comparisons between adjacent lags and with DL models. This study was also correlational, and  
519 inferred relationships with individual weather variables may be confounded by collinearity and  
520 correlation with other weather variables, and thus makes it difficult to tease out individual direct  
521 effects.

522

## 523 **Conclusions**

524 In our study of malaria incidence in Loreto Region, Peru, we observed generally positive  
525 associations with higher temperatures and higher rainfall for extended lag periods beginning 2–3  
526 weeks after symptom onset and enduring for about 1–4 months. Our findings indicated that the  
527 coupled transmission and relapse cycle of *Pv-An. darlingi* may have more complicated  
528 associations with higher temperatures than other malaria parasite – vector pairings, a critical  
529 finding in the face of climate change and global warming. These findings provide critical context  
530 to ongoing malaria elimination efforts, since apparent successes or failures of malaria  
531 interventions may be due in part to long-lasting effects of weather on initial infection and  
532 relapse.

533

## REFERENCES

- 534 1 Kattenberg JH, Erhart A, Truong MH, *et al.* Characterization of *Plasmodium falciparum* and  
535 *Plasmodium vivax* recent exposure in an area of significantly decreased transmission intensity  
536 in Central Vietnam. *Malaria Journal* 2018; **17**: 180.
- 537 2 Global technical strategy for malaria 2016–2030, 2021 update. 2021.
- 538 3 Hulden L, Hulden L. Activation of the hypnozoite: a part of *Plasmodium vivax* life cycle and  
539 survival. *Malar J* 2011; **10**: 90.
- 540 4 Olliaro PL, Barnwell JW, Barry A, *et al.* Implications of *Plasmodium vivax* Biology for  
541 Control, Elimination, and Research. *Am J Trop Med Hyg* 2016; **95**: 4–14.
- 542 5 da Silva-Nunes M, Moreno M, Conn JE, *et al.* Amazonian malaria: Asymptomatic human  
543 reservoirs, diagnostic challenges, environmentally-driven changes in mosquito vector  
544 populations, and the mandate for sustainable control strategies. *Acta Trop* 2012; **121**: 281–91.
- 545 6 Howes RE, Battle KE, Mendis KN, *et al.* Global Epidemiology of *Plasmodium vivax*. *Am J*  
546 *Trop Med Hyg* 2016; **95**: 15–34.
- 547 7 Rosas-Aguirre A, Gamboa D, Manrique P, *et al.* Epidemiology of *Plasmodium vivax* Malaria  
548 in Peru. *Am J Trop Med Hyg* 2016; **95**: 133–44.
- 549 8 Sadoine ML, Smargiassi A, Ridde V, Tusting LS, Zinszer K. The associations between  
550 malaria, interventions, and the environment: a systematic review and meta-analysis. *Malar J*  
551 2018; **17**: 73.
- 552 9 Hiwat H, Bretas G. Ecology of *Anopheles darlingi* Root with respect to vector importance: a  
553 review. *Parasites Vectors* 2011; **4**: 177.
- 554 10Mordecai EA, Caldwell JM, Grossman MK, *et al.* Thermal biology of mosquito-borne  
555 disease. *Ecol Lett* 2019; **22**: 1690–708.
- 556 11Villena OC, Ryan SJ, Murdock CC, Johnson LR. Temperature impacts the environmental  
557 suitability for malaria transmission by *Anopheles gambiae* and *Anopheles stephensi*. *Ecology*  
558 2022; **103**: e3685.
- 559 12Gething PW, Van Boeckel TP, Smith DL, *et al.* Modelling the global constraints of  
560 temperature on transmission of *Plasmodium falciparum* and *P. vivax*. *Parasites Vectors* 2011;  
561 **4**: 92.
- 562 13Gilman RH, Cabrera L, Lee E, *et al.* ENDEMIC MALARIA IN THE PERUVIAN AMAZON  
563 REGION OF IQUITOS. *The American Journal of Tropical Medicine and Hygiene* 2003; **69**:  
564 45–52.
- 565 14Stratman-Thomas WK. The Influence of Temperature on *Plasmodium Vivax*. *The American*  
566 *Journal of Tropical Medicine and Hygiene* 1940; **s1-20**: 703–15.

- 567 15Suh E, Grossman MK, Waite JL, *et al.* The influence of feeding behaviour and temperature on  
568 the capacity of mosquitoes to transmit malaria. *Nat Ecol Evol* 2020; **4**: 940–51.
- 569 16White NJ. Determinants of relapse periodicity in *Plasmodium vivax* malaria. *Malar J* 2011;  
570 **10**: 297.
- 571 17Mordecai EA, Paaijmans KP, Johnson LR, *et al.* Optimal temperature for malaria transmission  
572 is dramatically lower than previously predicted. *Ecology Letters* 2013; **16**: 22–30.
- 573 18Schäfer C, Zanghi G, Vaughan AM, Kappe SHI. *Plasmodium vivax* Latent Liver Stage  
574 Infection and Relapse: Biological Insights and New Experimental Tools. *Annu Rev Microbiol*  
575 2021; **75**: 87–106.
- 576 19malaria.pdf. <https://www.dge.gob.pe/portal/docs/vigilancia/sala/2022/SE42/malaria.pdf>  
577 (accessed May 2, 2024).
- 578 20Bannister-Tyrrell M, Verdonck K, Hausmann-Muela S, Gryseels C, Muela Ribera J, Peeters  
579 Grietens K. Defining micro-epidemiology for malaria elimination: systematic review and  
580 meta-analysis. *Malar J* 2017; **16**: 164.
- 581 21Rosas-Aguirre A, Guzman-Guzman M, Gamboa D, *et al.* Micro-heterogeneity of malaria  
582 transmission in the Peruvian Amazon: a baseline assessment underlying a population-based  
583 cohort study. *Malar J* 2017; **16**: 312.
- 584 22Paaijmans KP, Blanford S, Bell AS, Blanford JI, Read AF, Thomas MB. Influence of climate  
585 on malaria transmission depends on daily temperature variation. *Proceedings of the National*  
586 *Academy of Sciences* 2010; **107**: 15135–9.
- 587 23MacDonald AJ, Mordecai EA. Amazon deforestation drives malaria transmission, and malaria  
588 burden reduces forest clearing. *Proceedings of the National Academy of Sciences* 2019; **116**:  
589 22212–8.
- 590 24Janko MM, Recalde-Coronel GC, Damasceno CP, *et al.* The impact of sustained malaria  
591 control in the Loreto region of Peru: a retrospective, observational, spatially-varying  
592 interrupted time series analysis of the PAMAFRO program. *The Lancet Regional Health –*  
593 *Americas* 2023; **20**. DOI:10.1016/j.lana.2023.100477.
- 594 25189846\_RM\_244-2017-MINSA.PDF20180823-24725-1yk3i0y.pdf.  
595 [https://cdn.www.gob.pe/uploads/document/file/190350/189846\\_RM\\_244-2017-](https://cdn.www.gob.pe/uploads/document/file/190350/189846_RM_244-2017-MINSA.PDF20180823-24725-1yk3i0y.PDF)  
596 [MINSA.PDF20180823-24725-1yk3i0y.PDF](https://cdn.www.gob.pe/uploads/document/file/190350/189846_RM_244-2017-MINSA.PDF20180823-24725-1yk3i0y.PDF) (accessed Nov 21, 2024).
- 597 26Muñoz-Sabater J, Dutra E, Agustí-Panareda A, *et al.* ERA5-Land: a state-of-the-art global  
598 reanalysis dataset for land applications. *Earth System Science Data* 2021; **13**: 4349–83.
- 599 27MapBiomias Peru Project. Collection 2 of the Annual Land Cover and Land Use Series for  
600 Peru. [https://storage.googleapis.com/mapbiomas-](https://storage.googleapis.com/mapbiomas-public/initiatives/peru/collection_2/coverage/peru_coverage_2022.tif)  
601 [public/initiatives/peru/collection\\_2/coverage/peru\\_coverage\\_2022.tif](https://storage.googleapis.com/mapbiomas-public/initiatives/peru/collection_2/coverage/peru_coverage_2022.tif) (accessed Oct 13, 2023).



- 602 28Gasparri A, Armstrong B, Kenward MG. Distributed lag non-linear models. *Stat Med* 2010;  
603 29: 2224–34.
- 604 29Gasparri A. Distributed Lag Linear and Non-Linear Models in R: The Package dlnm. *J Stat*  
605 *Softw* 2011; 43: 1–20.
- 606 30Llanos-Cuentas A, Lacerda MVG, Hien TT, *et al.* Tafenoquine versus Primaquine to Prevent  
607 Relapse of Plasmodium vivax Malaria. *New England Journal of Medicine* 2019; 380: 229–41.
- 608 31Poespoprodjo JR, Burdam FH, Candrawati F, *et al.* Supervised versus unsupervised  
609 primaquine radical cure for the treatment of falciparum and vivax malaria in Papua, Indonesia:  
610 a cluster-randomised, controlled, open-label superiority trial. *The Lancet Infectious Diseases*  
611 2022; 22: 367–76.
- 612 32Popovici J, Tebben K, Witkowski B, Serre D. Primaquine for *Plasmodium vivax* radical cure:  
613 What we do not know and why it matters. *International Journal for Parasitology: Drugs and*  
614 *Drug Resistance* 2021; 15: 36–42.
- 615 33Carrasco-Escobar G, Miranda-Alban J, Fernandez-Miño C, *et al.* High prevalence of very-  
616 low Plasmodium falciparum and Plasmodium vivax parasitaemia carriers in the Peruvian  
617 Amazon: insights into local and occupational mobility-related transmission. *Malar J* 2017; 16:  
618 415.
- 619 34Chuquiyauri R, Peñataro P, Brouwer KC, *et al.* Microgeographical Differences of  
620 Plasmodium vivax Relapse and Re-Infection in the Peruvian Amazon. *Am J Trop Med Hyg*  
621 2013; 89: 326–38.
- 622 35Chu CS, White NJ. Management of relapsing Plasmodium vivax malaria. *Expert Rev Anti*  
623 *Infect Ther* 2016; 14: 885–900.
- 624 36Moustapha IE, Moukah MO, Salem MSOA, *et al.* Malaria prevalence in Mauritania: a  
625 systematic review and meta-analysis. *Malaria Journal* 2023; 22: 146.
- 626 37Kim Y-M, Park J-W, Cheong H-K. Estimated Effect of Climatic Variables on the  
627 Transmission of Plasmodium vivax Malaria in the Republic of Korea. *Environ Health*  
628 *Perspect* 2012; 120: 1314–9.
- 629 38Bi Y, Yu W, Hu W, *et al.* Impact of climate variability on Plasmodium vivax and Plasmodium  
630 falciparum malaria in Yunnan Province, China. *Parasit Vectors* 2013; 6: 357.
- 631 39Moreno M, Saavedra MP, Bickersmith SA, *et al.* Implications for changes in Anopheles  
632 darlingi biting behaviour in three communities in the peri-Iquitos region of Amazonian Peru.  
633 *Malar J* 2015; 14: 290.
- 634 40Wangdi K, Wetzler E, Cox H, Marchesini P, Villegas L, Canavati S. Spatial patterns and  
635 climate drivers of malaria in three border areas of Brazil, Venezuela and Guyana, 2016–2018.  
636 *Scientific Reports* 2022; 12. DOI:10.1038/s41598-022-14012-4.

- 637 41 Schäfer C, Zanghi G, Vaughan AM, Kappe SHI. Plasmodium vivax Latent Liver Stage  
638 Infection and Relapse: Biological Insights and New Experimental Tools. *Annual Review of*  
639 *Microbiology* 2021; **75**: 87–106.
- 640 42 Munayco CV. Notas Desde el Campo: Brote de Dengue — Perú, 2023. *MMWR Morb Mortal*  
641 *Wkly Rep* 2024; **73**. [https://www.cdc.gov/mmwr/volumes/73/wr/mm7304a4\\_ensp.htm](https://www.cdc.gov/mmwr/volumes/73/wr/mm7304a4_ensp.htm)  
642 (accessed Oct 27, 2024).
- 643 43 López MS, Gómez AA, Müller GV, Walker E, Robert MA, Estallo EL. Relationship between  
644 Climate Variables and Dengue Incidence in Argentina. *Environmental Health Perspectives*  
645 2023; **131**: 057008.
- 646 44 Fan J, Wei W, Bai Z, *et al.* A Systematic Review and Meta-Analysis of Dengue Risk with  
647 Temperature Change. *International Journal of Environmental Research and Public Health*  
648 2015; **12**: 1–15.
- 649 45 Hii YL, Rocklöv J, Ng N, Tang CS, Pang FY, Sauerborn R. Climate variability and increase  
650 in intensity and magnitude of dengue incidence in Singapore. *Global Health Action* 2009; **2**:  
651 2036.
- 652 46 Koyadun S, Butraporn P, Kittayapong P. Ecologic and Sociodemographic Risk Determinants  
653 for Dengue Transmission in Urban Areas in Thailand. *Interdisciplinary Perspectives on*  
654 *Infectious Diseases* 2012; **2012**: 907494.
- 655 47 Misslin R, Telle O, Daudé E, Vaguet A, Paul RE. Urban climate versus global climate  
656 change—what makes the difference for dengue? *Annals of the New York Academy of Sciences*  
657 2016; **1382**: 56–72.
- 658 48 Carrasco-Escobar G, Manrique E, Ruiz-Cabrejos J, *et al.* High-accuracy detection of malaria  
659 vector larval habitats using drone-based multispectral imagery. *PLoS Negl Trop Dis* 2019; **13**:  
660 e0007105.

661

662

663 **Figure 1. Timeline of main hypothesized mechanisms of the impact of temperature and**  
664 **precipitation on *Plasmodium vivax* infection.** Time estimates are generalized and were generated from  
665 previous findings.

666  
667 **Figure 2. Study area map.** Dark green areas indicate forest cells. Circles with black outlines represent  
668 the 30 study communities, colored by annual malaria incidence per 1000 individuals. The blue river to the  
669 right of Iquitos is the Amazon River.

670  
671 **Figure 3. Weather and malaria incidence trends over the study period.** All measures are aggregated  
672 weekly. The blue dots in plot A mark weeks with a heavy rain event, defined as one or more days when  
673 the daily precipitation total exceeded the 90th percentile, which averaged 186mm over the study period.  
674 The orange dots in plot B mark weeks with a high heat event, defined as one or more days when the mean  
675 temperature exceeded the 90th percentile. Shaded blue regions represent the rainy season, defined as  
676 November–April. In plot B, the darker orange line tracks the maximum temperature observed each week,  
677 and the lighter orange line tracks the minimum temperature observed each week.

678  
679 **Figure 4. Association between temperature and malaria incidence.** The associations were fit using  
680 distributed lag non-linear models. Plots A–C show the association for minimum temperature, and plots  
681 D–F show the association for maximum temperature. For all plots, incidence ratios are relative to  
682 reference weeks with the minimum observed predictor value. Plots A and D show the association between  
683 temperature and malaria incidence at the median predictor value compared to the reference. For minimum  
684 temperature, the reference is 16.8°C; for maximum temperature, the reference is 28.4°C. For minimum  
685 temperature, the median is 22.5°C. For maximum temperature, the median is 31.8°C.

686  
687 **Figure 5. Association between binary predictors and malaria incidence.** Incidence ratios were  
688 calculated for weeks with the event relative to weeks without the event. The average high heat threshold  
689 over the study period was 27.5°C. The average heavy rain threshold over the study period was >186 mm  
690 of precipitation in one day. High heat estimates at each lag were adjusted for total precipitation at the  
691 same lag. Heavy rain estimates at each lag were adjusted for maximum temperature at the same lag.

692  
693 **Figure 6. Association between total precipitation and malaria incidence.** The association was fit using  
694 a distributed lag non-linear model. For all plots, incidence ratios are relative to reference weeks with 0mm  
695 of precipitation. Plot A shows the association between precipitation and malaria incidence at the median  
696 predictor value, 450mm, compared to the reference.

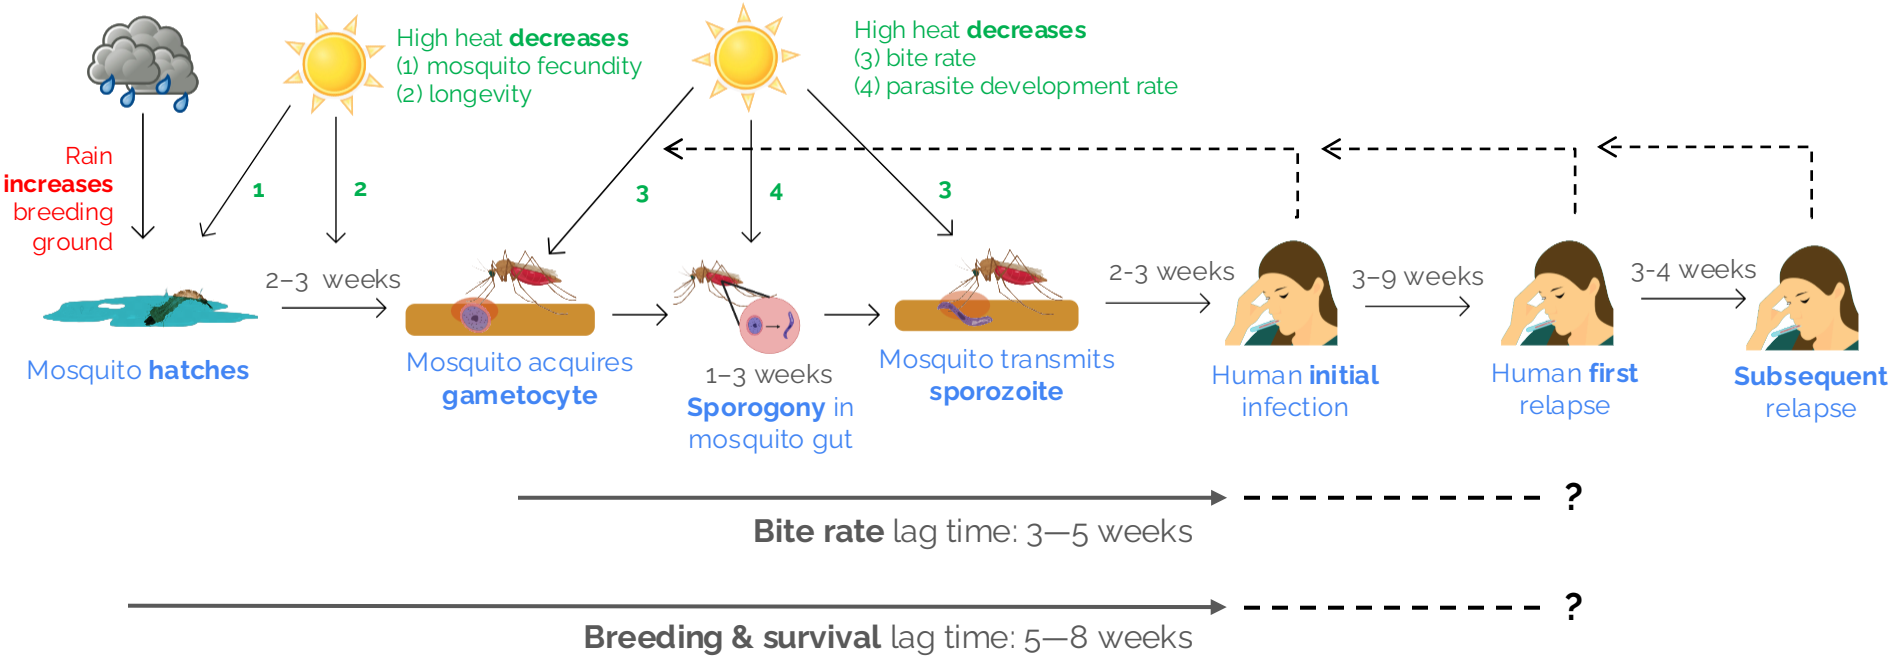

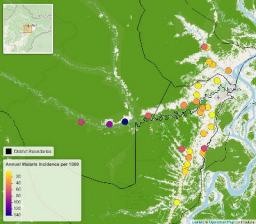

A) Total weekly precipitation (mm)

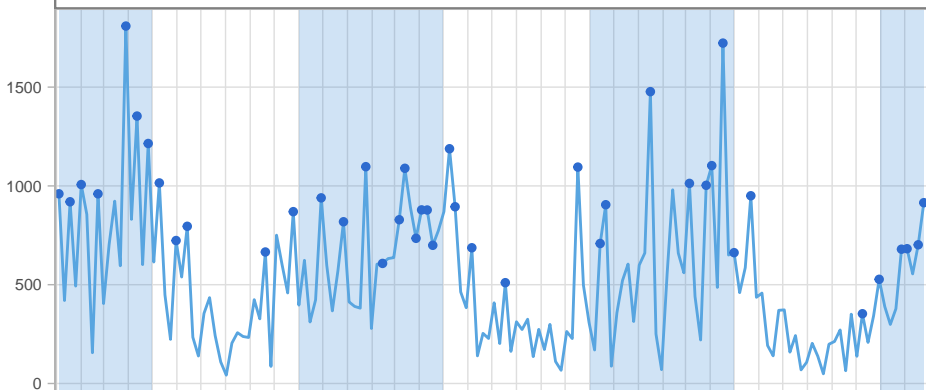

B) Minimum and maximum daily temperature (C)

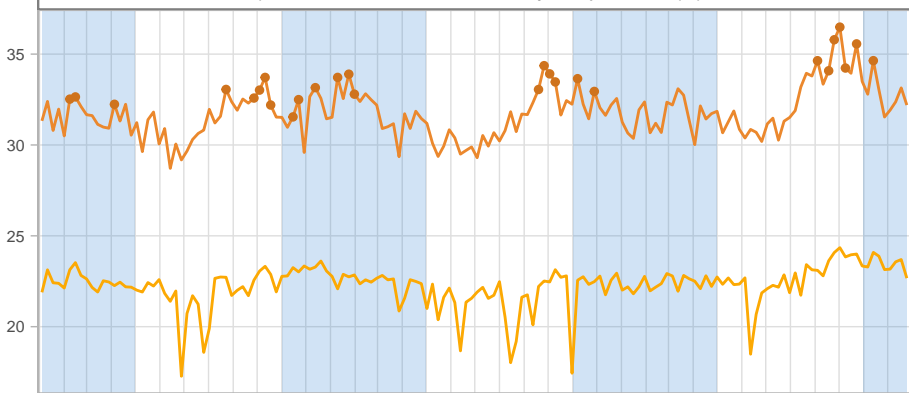

C) Malaria incidence per 1000 person-weeks

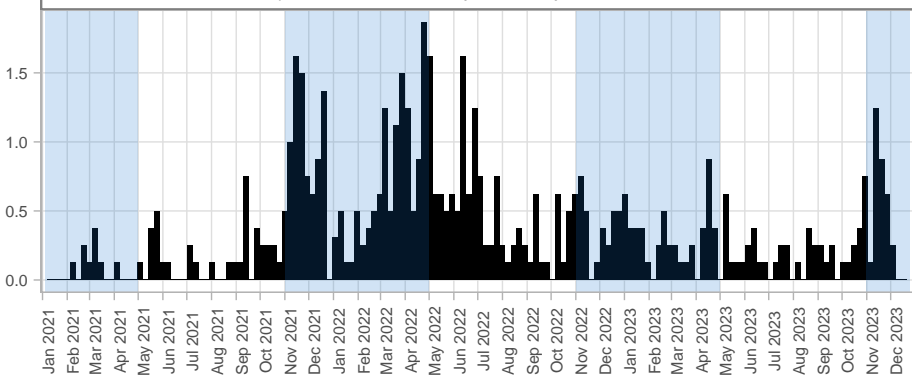

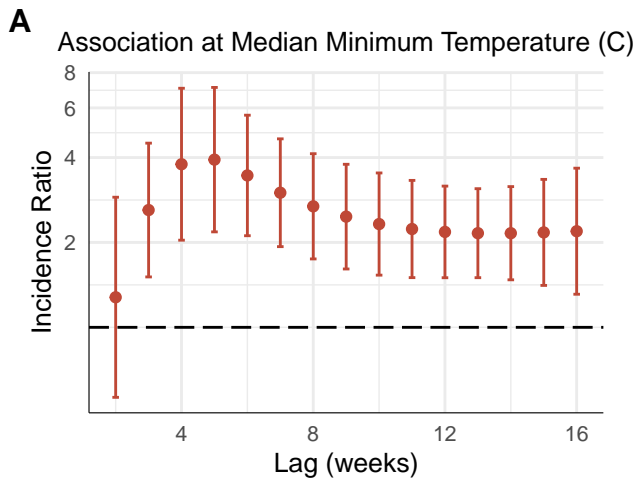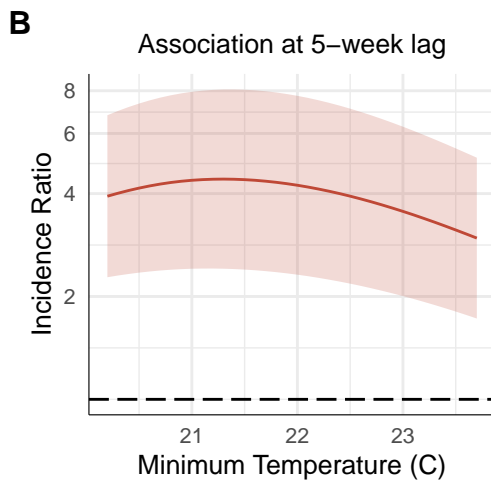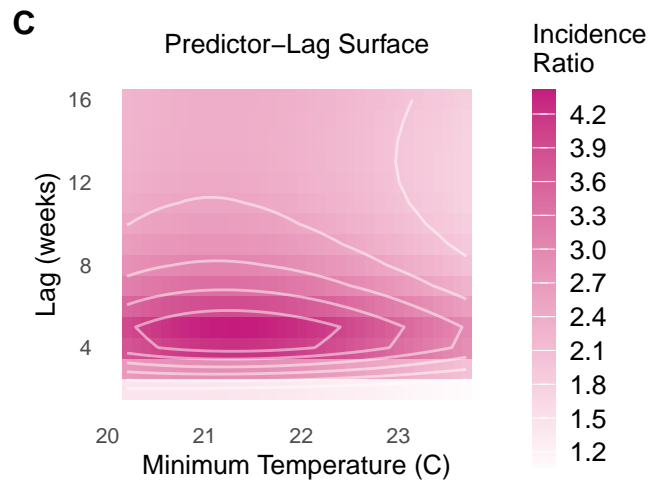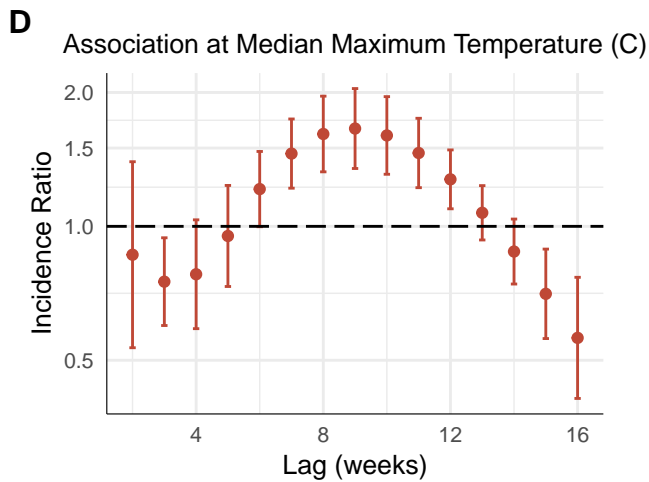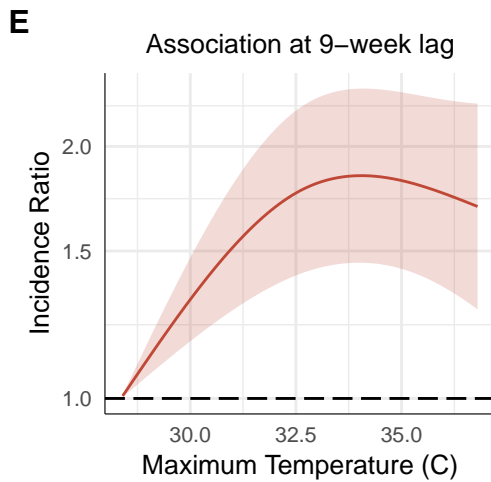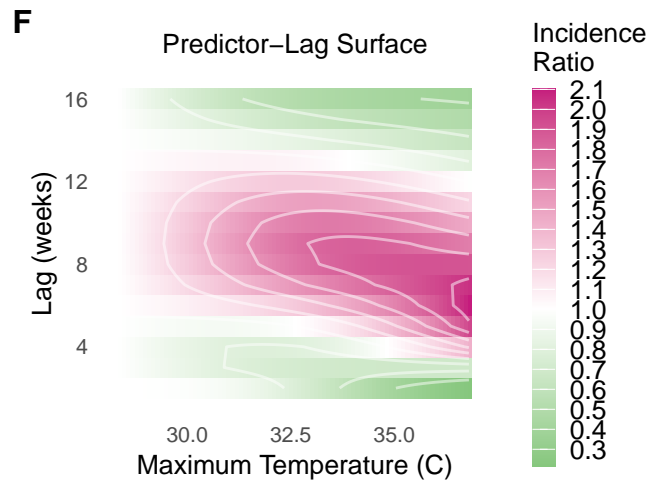

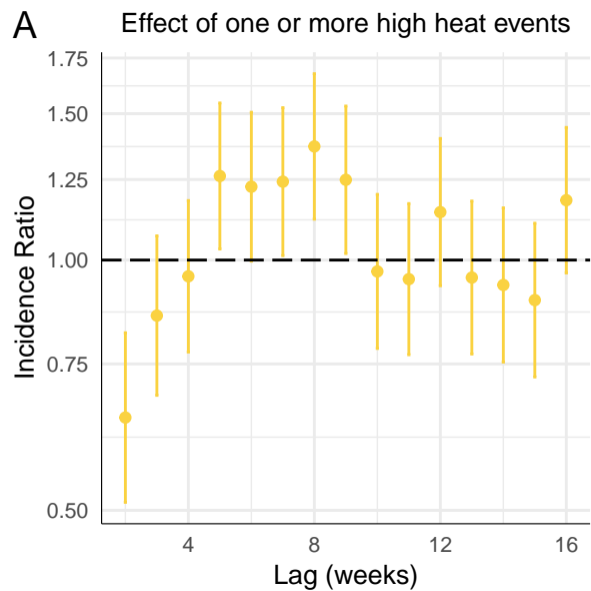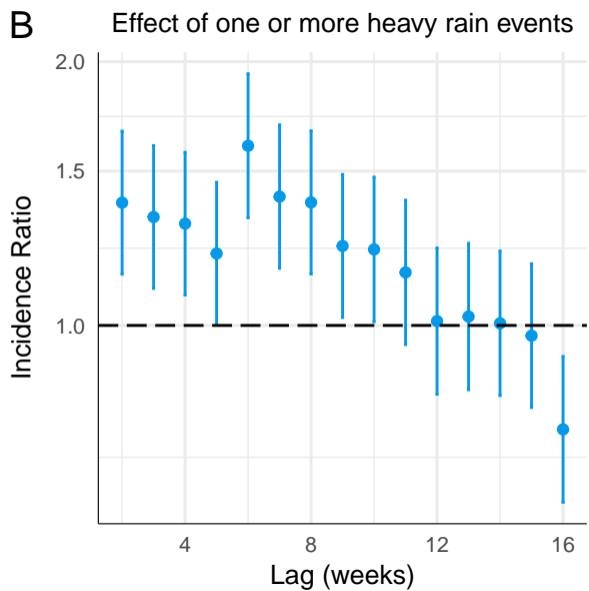



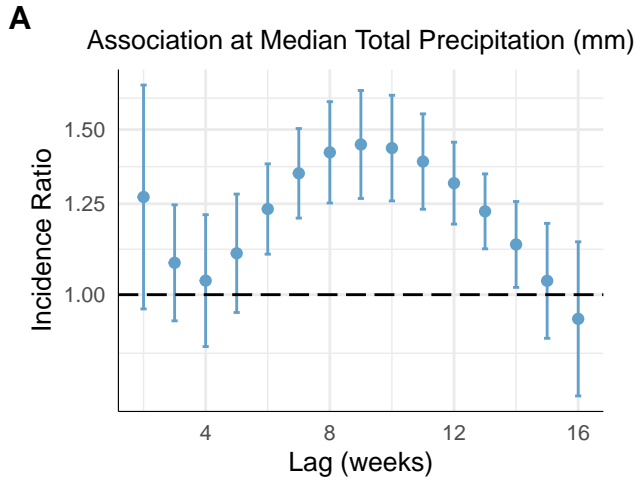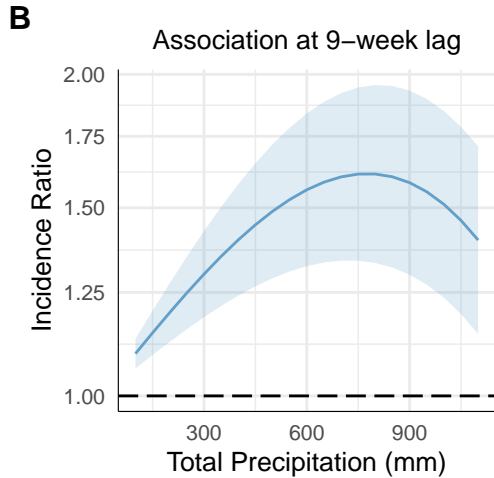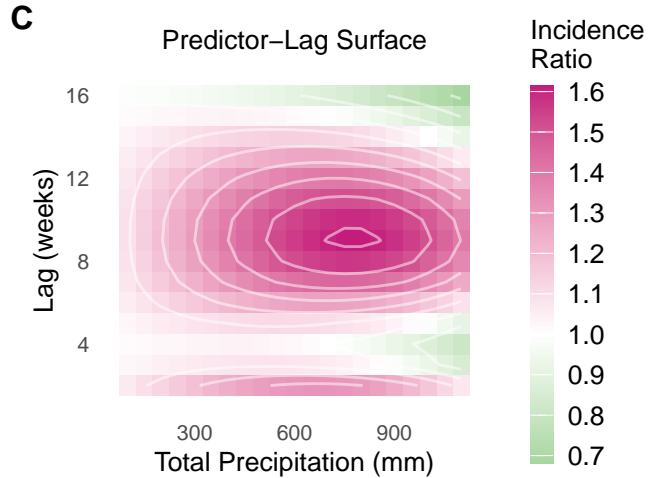

Source: https://medrxiv.org/content/10.1101/2024.11.26.24318000v1.full.pdf
